# Supplementary material for: Off-Label Prescribing of Psychotropic Medication, 2005–2013: An Examination of Potential Influences
Source: Atypon-hosted journal article supplement (doi:10.1176/appi.ps.201500482), 2017-01-17
Supplement: appi.ps.201500482.ds001.pdf [file appi.ps.201500482.ds001.pdf]

**ON-LINE TABLE A. FDA-approved uses for anxiolytics included in 2005 and 2013 data**

| <b>Classification<sup>a</sup>/Drug</b>         | <b>FDA-approved uses as of 2005<sup>b, c</sup></b>                                                                                                                                                                                                                                                                                        | <b>Additional FDA-approved uses by 2013<sup>b, c</sup></b>                                                                                                                                                                                      |
|------------------------------------------------|-------------------------------------------------------------------------------------------------------------------------------------------------------------------------------------------------------------------------------------------------------------------------------------------------------------------------------------------|-------------------------------------------------------------------------------------------------------------------------------------------------------------------------------------------------------------------------------------------------|
| <b>Benzodiazepines<sup>d</sup></b>             |                                                                                                                                                                                                                                                                                                                                           |                                                                                                                                                                                                                                                 |
| chlordiazepoxide HCL                           | Anxiety disorders and short-term relief of anxiety symptoms, withdrawal symptoms of acute alcoholism, and preoperative apprehension and anxiety                                                                                                                                                                                           |                                                                                                                                                                                                                                                 |
| lorazepam, lorazepam intensol                  | Anxiety disorders or short-term relief of symptoms of anxiety or anxiety associated with depressive symptoms<br>By injection: status epilepticus, prenaesthetic, sedation, relief of pre-surgical anxiety                                                                                                                                 |                                                                                                                                                                                                                                                 |
| diazepam, diazepam c-ject                      | Anxiety disorders and short-term relief of anxiety symptoms; relief of symptoms of acute alcohol withdrawal; adjunctively for skeletal muscle spasm due to reflex spasm to local pathology, spasticity caused by upper motor neuron disorders, athetosis, and stiff-man syndrome; adjunctively in convulsive disorders                    | Sedation, premedication before surgery, endoscopic procedures and cardioversion<br>As a rectal gel for selected refractory patients with epilepsy on stable regimens of AEDs who require intermittent use to control increased seizure activity |
| lorazepate dipotassium                         | Anxiety disorders and short-term relief of anxiety symptoms, adjunctive therapy for management of partial seizures, symptomatic relief of acute alcohol withdrawal                                                                                                                                                                        |                                                                                                                                                                                                                                                 |
| alprazolam, alprazolam ER, alprazolam intensol | Anxiety disorders or short-term relief of symptoms of anxiety, panic disorder                                                                                                                                                                                                                                                             | Generalized anxiety disorder                                                                                                                                                                                                                    |
| oxazepam                                       | Anxiety disorders or short-term relief of symptoms of anxiety, anxiety associated with depression, alcohol withdrawal syndrome                                                                                                                                                                                                            |                                                                                                                                                                                                                                                 |
| midazolam HCL                                  | Sedation for a mechanically ventilated patient, sedation or anxiolysis or amnesia prior to or during procedures, induction of anesthesia                                                                                                                                                                                                  |                                                                                                                                                                                                                                                 |
| <b>Antianxiety, other</b>                      |                                                                                                                                                                                                                                                                                                                                           |                                                                                                                                                                                                                                                 |
| hydroxyzine HCL, hydroxyzine pamoate           | Anxiety and tension associated with psychoneurosis and as an adjunct in organic disease states in which anxiety is manifested; pruritus due to allergic conditions such as chronic urticaria and atopic and contact dermatoses and histamine-mediated pruritus; as a sedative when used as premedication and following general anesthesia | Alcohol withdrawal syndrome, analgesia in labor, pre- and postpartum reduction of narcotic use, relief of anxiety, emesis control, nausea and vomiting, pre- and postoperative non-pregnancy-related pain, psychomotor agitation                |
| bupirone HCL                                   | Anxiety disorders or short-term relief of symptoms of anxiety                                                                                                                                                                                                                                                                             |                                                                                                                                                                                                                                                 |

| Classification <sup>a</sup> /Drug | FDA-approved uses as of 2005 <sup>b, c</sup>                   | Additional FDA-approved uses by 2013 <sup>b, c</sup>                      |
|-----------------------------------|----------------------------------------------------------------|---------------------------------------------------------------------------|
| meprobamate                       | Older drug, 2005 and earlier labels not available <sup>c</sup> | As of 2007, anxiety disorders or short-term relief of symptoms of anxiety |

<sup>a</sup> Walters Kluwer: Uniform System of Classification Cross-Reference File, 2014. Available at <http://www.wolterskluwercdi.com/uniform-system-of-classification-cross-reference-file/>

<sup>b</sup> Drug uses reflect those approved by the U.S. Food and Drug Administration between 2005 and 2013. Drugs@FDA. Available at <http://www.accessdata.fda.gov/scripts/cder/drugsatfda/index.cfm>. Accessed September 1, 2015 and May 27, 2016.

<sup>c</sup> For some older drugs, the Drugs@FDA website did not provide labeling information, historic or otherwise. For those drugs, we either used labeling information from the National Institutes of Health, U.S. National Library of Medicine (National Institutes of Health, U.S. National Library of Medicine: DailyMed. Available at <https://dailymed.nlm.nih.gov/dailymed/index.cfm>. Accessed May 27, 2016) or older Physicians' Desk References (Thomson PDR: Physicians' Desk Reference. Montvale, NJ: Thomson PDR, 2003, 2005).

<sup>d</sup> Many labels contain precautions about use in older adults (e.g., alprazolam).
